# Supplementary material for: The Organization of Frontostriatal Brain Wiring in Non-Affective Early Psychosis Compared with Healthy Subjects Using a Novel Diffusion Imaging Fiber Cluster Analysis
Source: Research Square preprint supplement (doi:10.21203/rs.3.rs-2062646/v1), 2022-09-20
Supplement: Supplementary file 1 [file ac5ac6cc31bb42f8a36a9b49.docx]

**Supplementary Section**

**Fig. S1.** 17 scatter plots, in each hemisphere, showing the relationship between cortical and caudate endpoint distances between a given cluster and the other 16. Paired t-tests comparing the mean inter-cluster endpoint distances at the level of the cortex and the level of the caudate between each cluster with the other 16 clusters revealed that fiber clusters coming from the ventrolateral (left and right hemisphere clusters 6 and 8), dorsolateral (right, but not left, hemisphere cluster 1) and orbitofrontal PFC (left and right hemisphere cluster 10) showed significant convergence (i.e., caudate endpoint distance < cortex endpoint distance) after correcting for multiple tests (see Table 1 for the p values.) The diagonal line indicates equal cortical and caudate distances. LH is left hemisphere; RH is right hemisphere.

**Fig. S2.** Permutation null distribution of chi-square statistic, EP-NA – HCs, for both left and right hemispheres. LH: left hemisphere; RH: right hemisphere. The dotted lines for the left and right hemispheres reflect the chi-square statistic value for the observed group comparisons, with the p values reflecting their significance.

**Fig. S3.** Mixed model regression analysis plots of the degree of cluster pair convergence, i.e., the cluster pair CQs, for both left and right hemispheres separately for all 17 clusters in both left and right hemispheres. P values reflect the group by fiber cluster pair interaction for each cluster. CQ: Convergence Quotient. Non−Aff: EP-NA. Ctrl: HC. Control: HC. L: Left. R-Right.
